# Supplementary material for: Cell-type dependent enhancer binding of the EWS/ATF1 fusion gene in clear cell sarcomas
Source: PubMed Central journal article supplement (PMC6728361; doi:10.1038/s41467-019-11745-1), 2019-09-05
Supplement: 41467_2019_11745_MOESM1_ESM.pdf [file 41467_2019_11745_MOESM1_ESM.pdf]

## Supplementary Information

Cell-type dependent enhancer binding of the EWS/ATF1 fusion gene in clear cell sarcomas

Komura et al.



## Supplementary Figure 1.

### Derivation of sarcoma-iPSCs

- a. Sarcoma-iPSCs exhibiting alkaline phosphatase activity. Scale bar: 300  $\mu\text{m}$ .
- b. qRT-PCR reveals that the expression levels of pluripotency-related genes (*Oct3/4* and *Nanog*) in established iPSC-like cell lines are equivalent to those in ESCs. Data are presented as the mean of technical triplicates. The expression level of ESCs was set to 1.
- c. Microarray analysis of G1297 (Dox OFF), sarcoma-iPSCs and control iPSCs/ESCs (GSE45916) reveals that sarcoma-iPSCs acquired ESC- and normal iPSC-like gene expression signatures. Color range is shown using a  $\log_2$  scale.
- d. Hierarchical clustering analysis of G1297, sarcoma-iPSC, and control ES/iPSCs (GSE45916) by microarray. Global gene expression profiles of sarcoma-iPSCs are similar to those of ESCs.
- e. Bisulfite sequencing analyses reveal that *Oct3/4* distal enhancer and *Nanog* promoter region are demethylated in sarcoma-derived iPSC-like cells. White and black circles indicate non-methylated and methylated cytosine at CpG sites, respectively.
- f. RT-PCR shows the silencing of the 4 exogenous factors in established sarcoma-iPSCs lines. The number of PCR cycles is also indicated.
- g. Shared chromosomal aberrations with G1297 are detected in sarcoma-iPSC lines G1 and G2.
- h. Direct sequencing confirms shared missense mutations of the *Plekhg5* and *Alk* genes in G1297 and sarcoma-derived iPSC-like cells (clone G3).
- i. Sarcoma-derived iPSC-like cells generated teratomas in the subcutaneous layer of immunocompromised mice. Scale bars: 100  $\mu\text{m}$ .

# Supplementary Figure 2

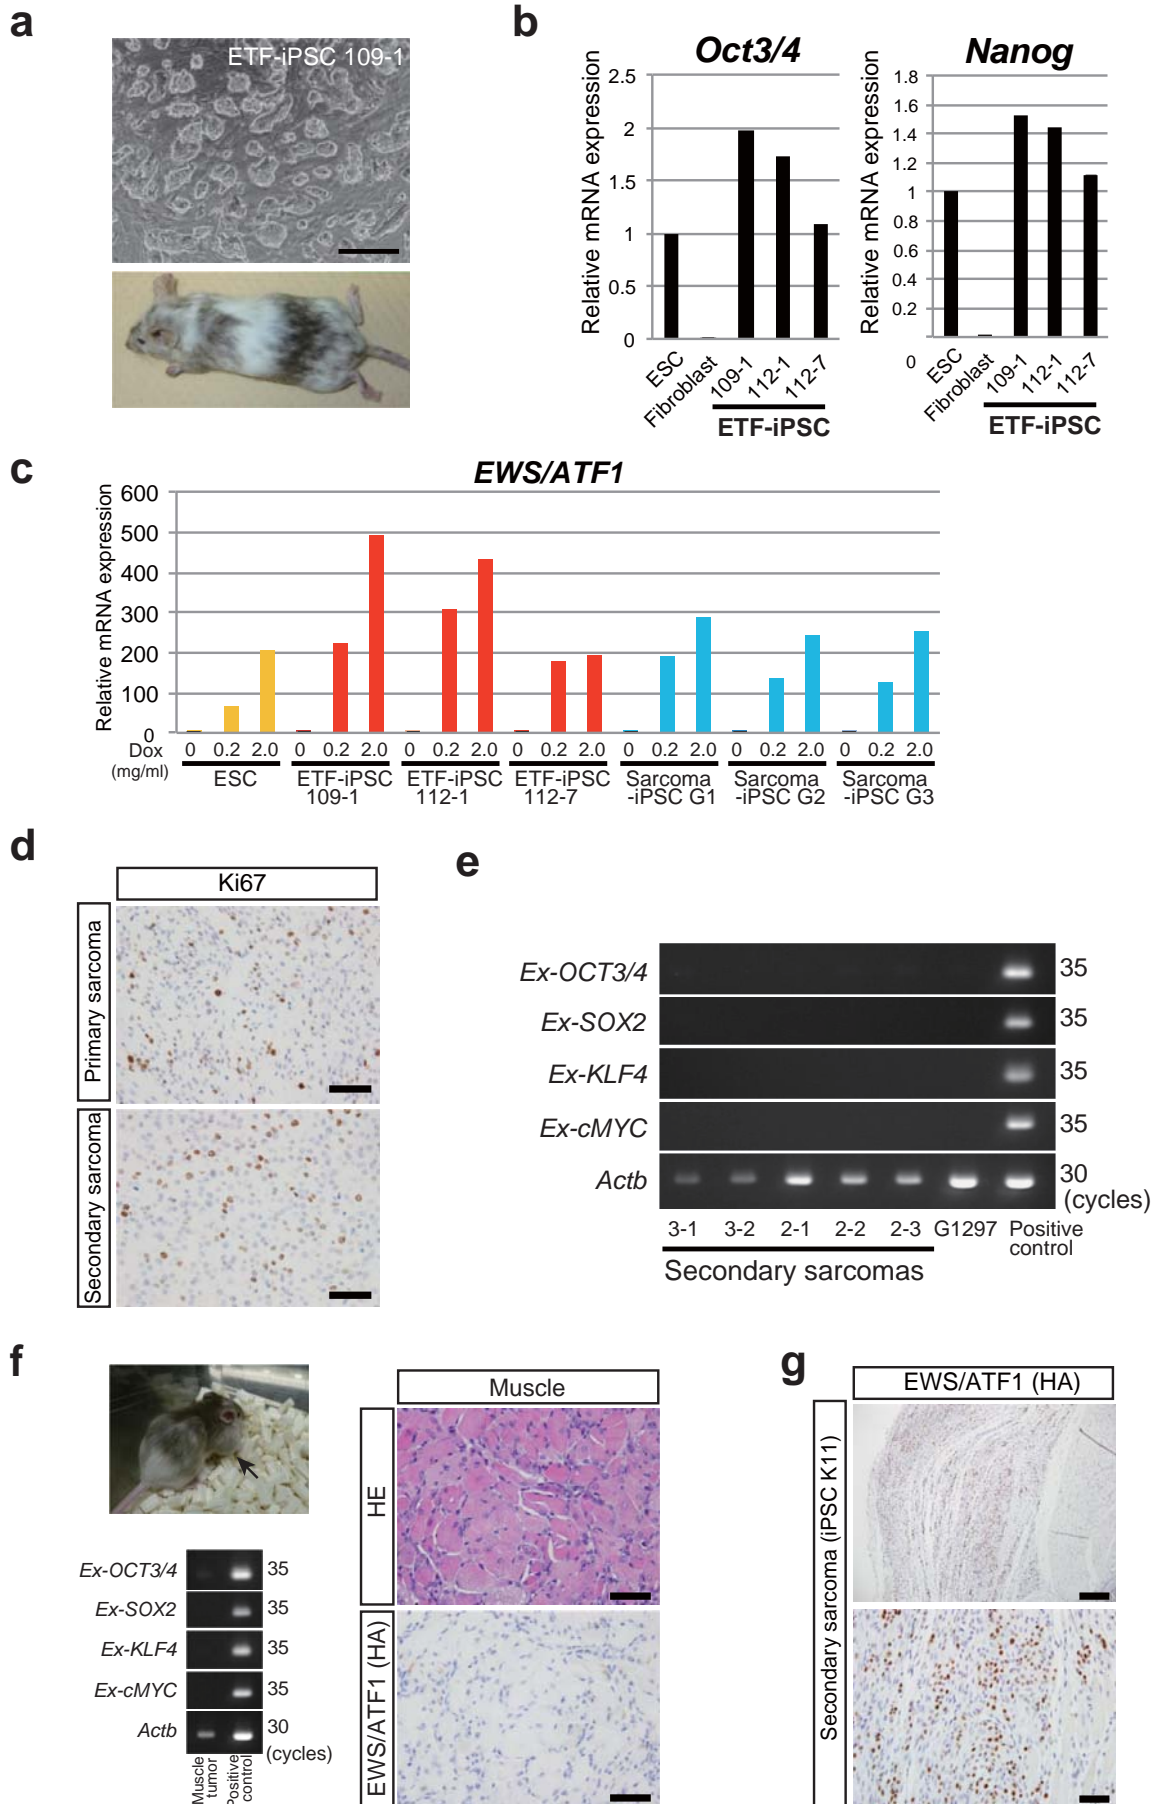

## Supplementary Figure 2.

### Sarcoma development in *EWS/ATF1*-inducible iPSC and ESC mice

- a. ETF-iPSCs were established from ear tip fibroblasts of CCS model mice harboring a Dox-inducible *EWS/ATF1* allele with the equivalent reprogramming method used for sarcoma-iPSCs derivation. ETF-iPSCs contributed to somatic cells of the chimeric mice after injection into blastocyst. Scale bar: 300  $\mu\text{m}$ .
- b. qRT-PCR reveals that the expression levels of pluripotency related genes (*Oct3/4* and *Nanog*) in established ETF-iPSCs are equivalent to those in ESCs. Data are presented as the mean of technical triplicates. The expression level of ESCs was set to 1.
- c. Comparison of *EWS/ATF1* expression level between ESCs, ETF-iPSCs, and sarcoma-iPSCs. Sarcoma-iPSCs exhibit similar expression levels of *EWS/ATF1* to control ESCs/iPSCs. Data are presented as the mean of technical triplicates. The expression level of ESC Dox0 was set to 1. Dox concentrations are 0, 0.2 and 2.0  $\mu\text{g/ml}$ , respectively, and Dox exposure time is 8 hours.
- d. Ki67 staining for primary and secondary sarcomas. Scale bars: 50  $\mu\text{m}$ .
- e. RT-PCR shows no obvious reactivation of exogenous 4 factors in secondary sarcomas. The number of PCR cycles is indicated.
- f. Dox-independent rhabdomyosarcoma was observed in 1 of 7 sarcoma-iPSC mice without Dox treatment. No reactivation of reprogramming factors is detected. HE staining of rhabdomyosarcoma (top) and negative HA immunostaining (bottom) are shown. Scale bars: 50  $\mu\text{m}$ .
- g. HA (*EWS/ATF1*) staining in secondary sarcomas in K11-iPSC-derived chimeric mice. Scale bar: 200  $\mu\text{m}$  (upper), 50  $\mu\text{m}$  (lower).

# Supplementary Figure 3

**a**

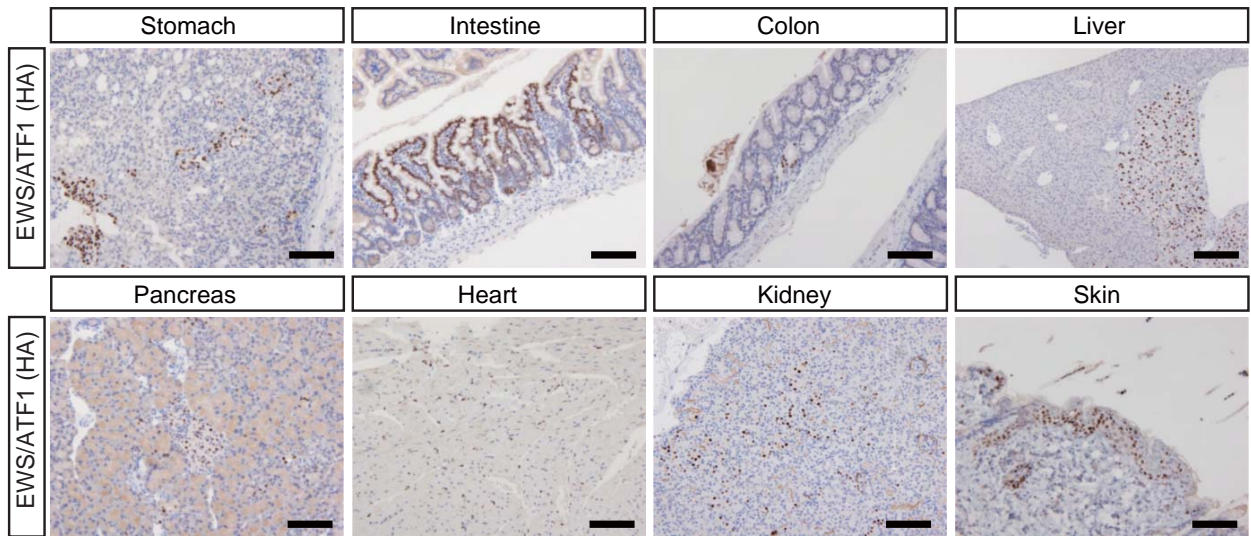

**b**

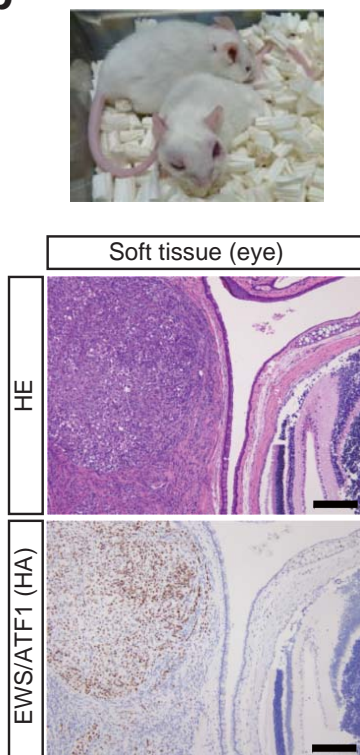

**c**

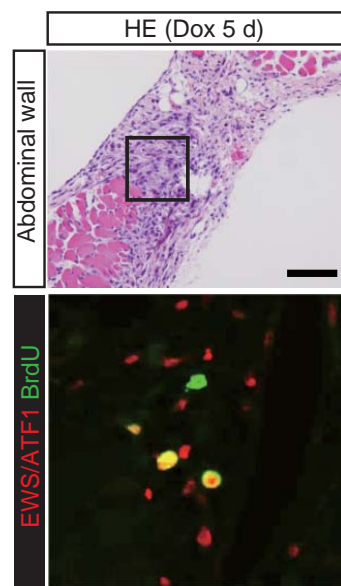

**d**

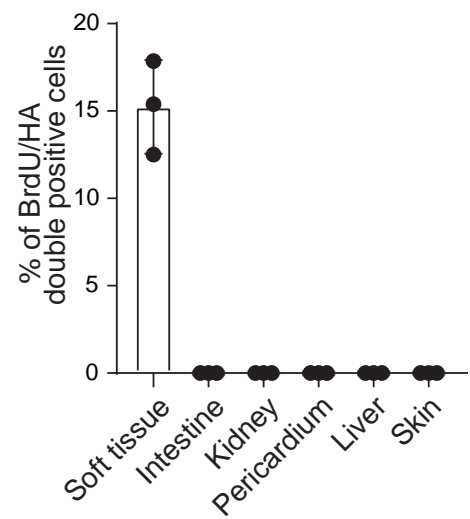

### Supplementary Figure 3.

#### ***EWS/ATF1* does not induce secondary sarcomas in a wide variety of cell types**

- a. Immunohistochemistry for EWS/ATF1 using HA antibody. Representative images demonstrating that EWS/ATF1-expressing cells are detectable in various organs and tissues in sarcoma-iPSC chimeric mice after Dox treatment for 5-7 days. Scale bars: 100  $\mu\text{m}$ .
- b. Secondary sarcoma development was found in soft tissue outside of the eyes. Anti-HA antibody is used to detect EWS/ATF1. Scale bars: 100  $\mu\text{m}$ .
- c. Dysplastic cells were often observed in the center of the abdominal wall (upper panel). Scale bars: 100  $\mu\text{m}$ . A lower panel shows immunofluorescence of the boxed region in the upper image using HA and BrdU antibodies. In sharp contrast to other organs, EWS/ATF1-expressing dysplastic cells at Day 5 display a BrdU signal, indicating escape from premature senescence.
- d. Quantitative analysis for BrdU positive cells in HA positive cells in different organs. The mean  $\pm$  SD of 3 independent biological experiments are shown, respectively.



**a** Sarcoma-iPSC (#3) MEFs

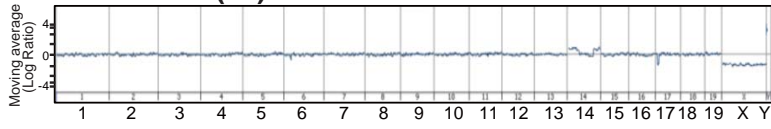

Secondary sarcoma

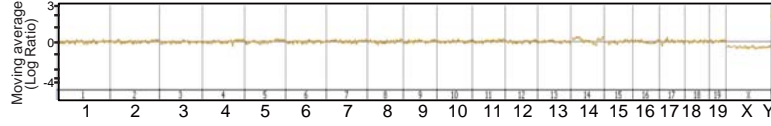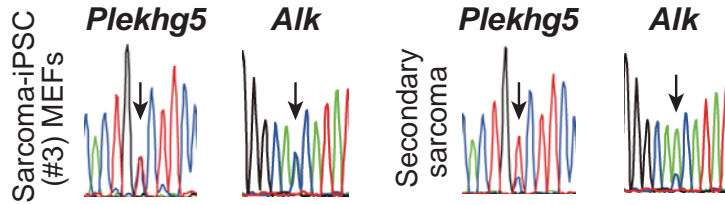

**b**

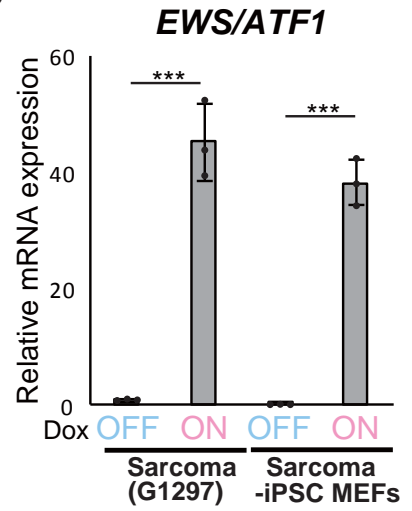

**c**

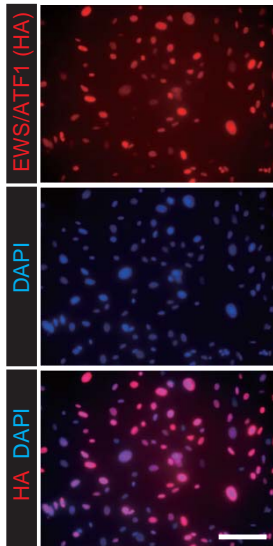

**d**

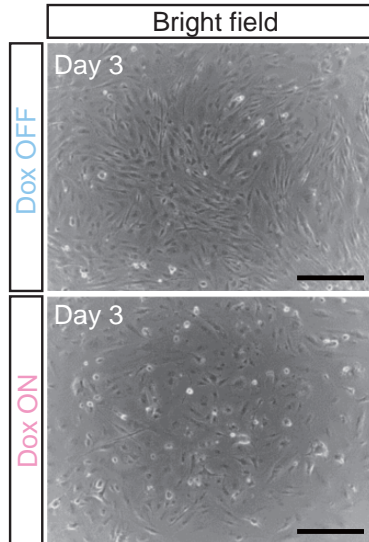

**e**

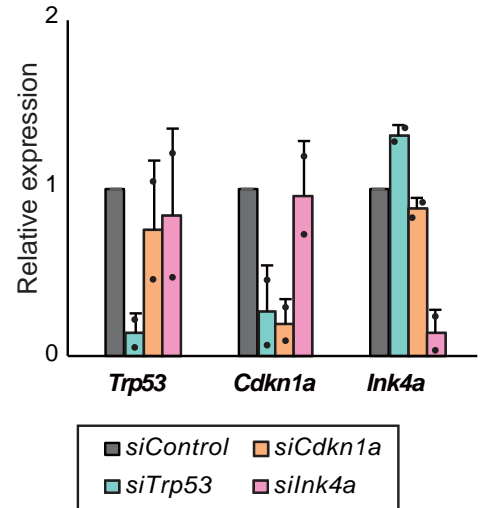

**f**

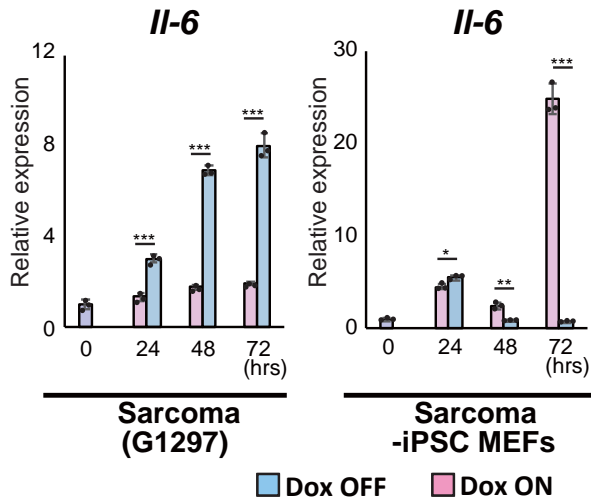



#### Supplementary Figure 4.

##### Sarcoma iPSC-derived MEFs exhibit growth arrest phenotype

- a. Array CGH analysis reveals that sarcoma-iPSC MEFs and secondary sarcoma harbor some G1297-specific chromosomal abnormalities. Exome sequencing shows *Plekhg5* and *Alk* mutations in both sarcoma-iPSC MEFs and secondary sarcoma.
- b. qRT-PCR analysis reveals comparative expression levels of *EWS/ATF1* in G1297 and sarcoma-iPSC MEFs (\*\*\*P < 0.001, two-sided Student's t-test). Data are presented as the mean  $\pm$  SD of triplicates. The mean expression level of G1297 Dox0 was set to 1. Dox concentration is 0.2  $\mu$ g/ml, and Dox exposure time is 48 hours. The mean  $\pm$  SD of 3 independent biological experiments are shown, respectively.
- c. Immunocytochemistry of sarcoma-iPSC MEFs using HA antibody reveals that most MEFs expressed EWS/ATF1. Dox exposure time is 12 hours. Scale bar: 300  $\mu$ m.
- d. *EWS/ATF1* induction in sarcoma-iPSC MEFs results in morphological changes and growth inhibition. Dox exposure time is 3 days. Scale bars: 300  $\mu$ m.
- e. Knockdown efficiency for senescence-related genes. Data are presented as the mean  $\pm$  SD of two independent experiments. The mean expression level of *siControl*-treated cells was set to 1.
- f. A qRT-PCR analysis for *Il-6* in sarcoma cells and sarcoma-iPSC MEFs. Sarcoma cells exhibit an increased expression of *Il-6* upon *EWS/ATF1* withdrawal, while sarcoma-iPSC MEFs show an increased *Il-6* expression upon *EWS/ATF1* induction (\*P < 0.05, \*\*P < 0.01, \*\*\*P < 0.001, two-sided Student's t-test). Data are presented as the mean  $\pm$  SD of independent biological triplicates. The mean expression level of samples at 0 h was set to 1.

# Supplementary Figure 5

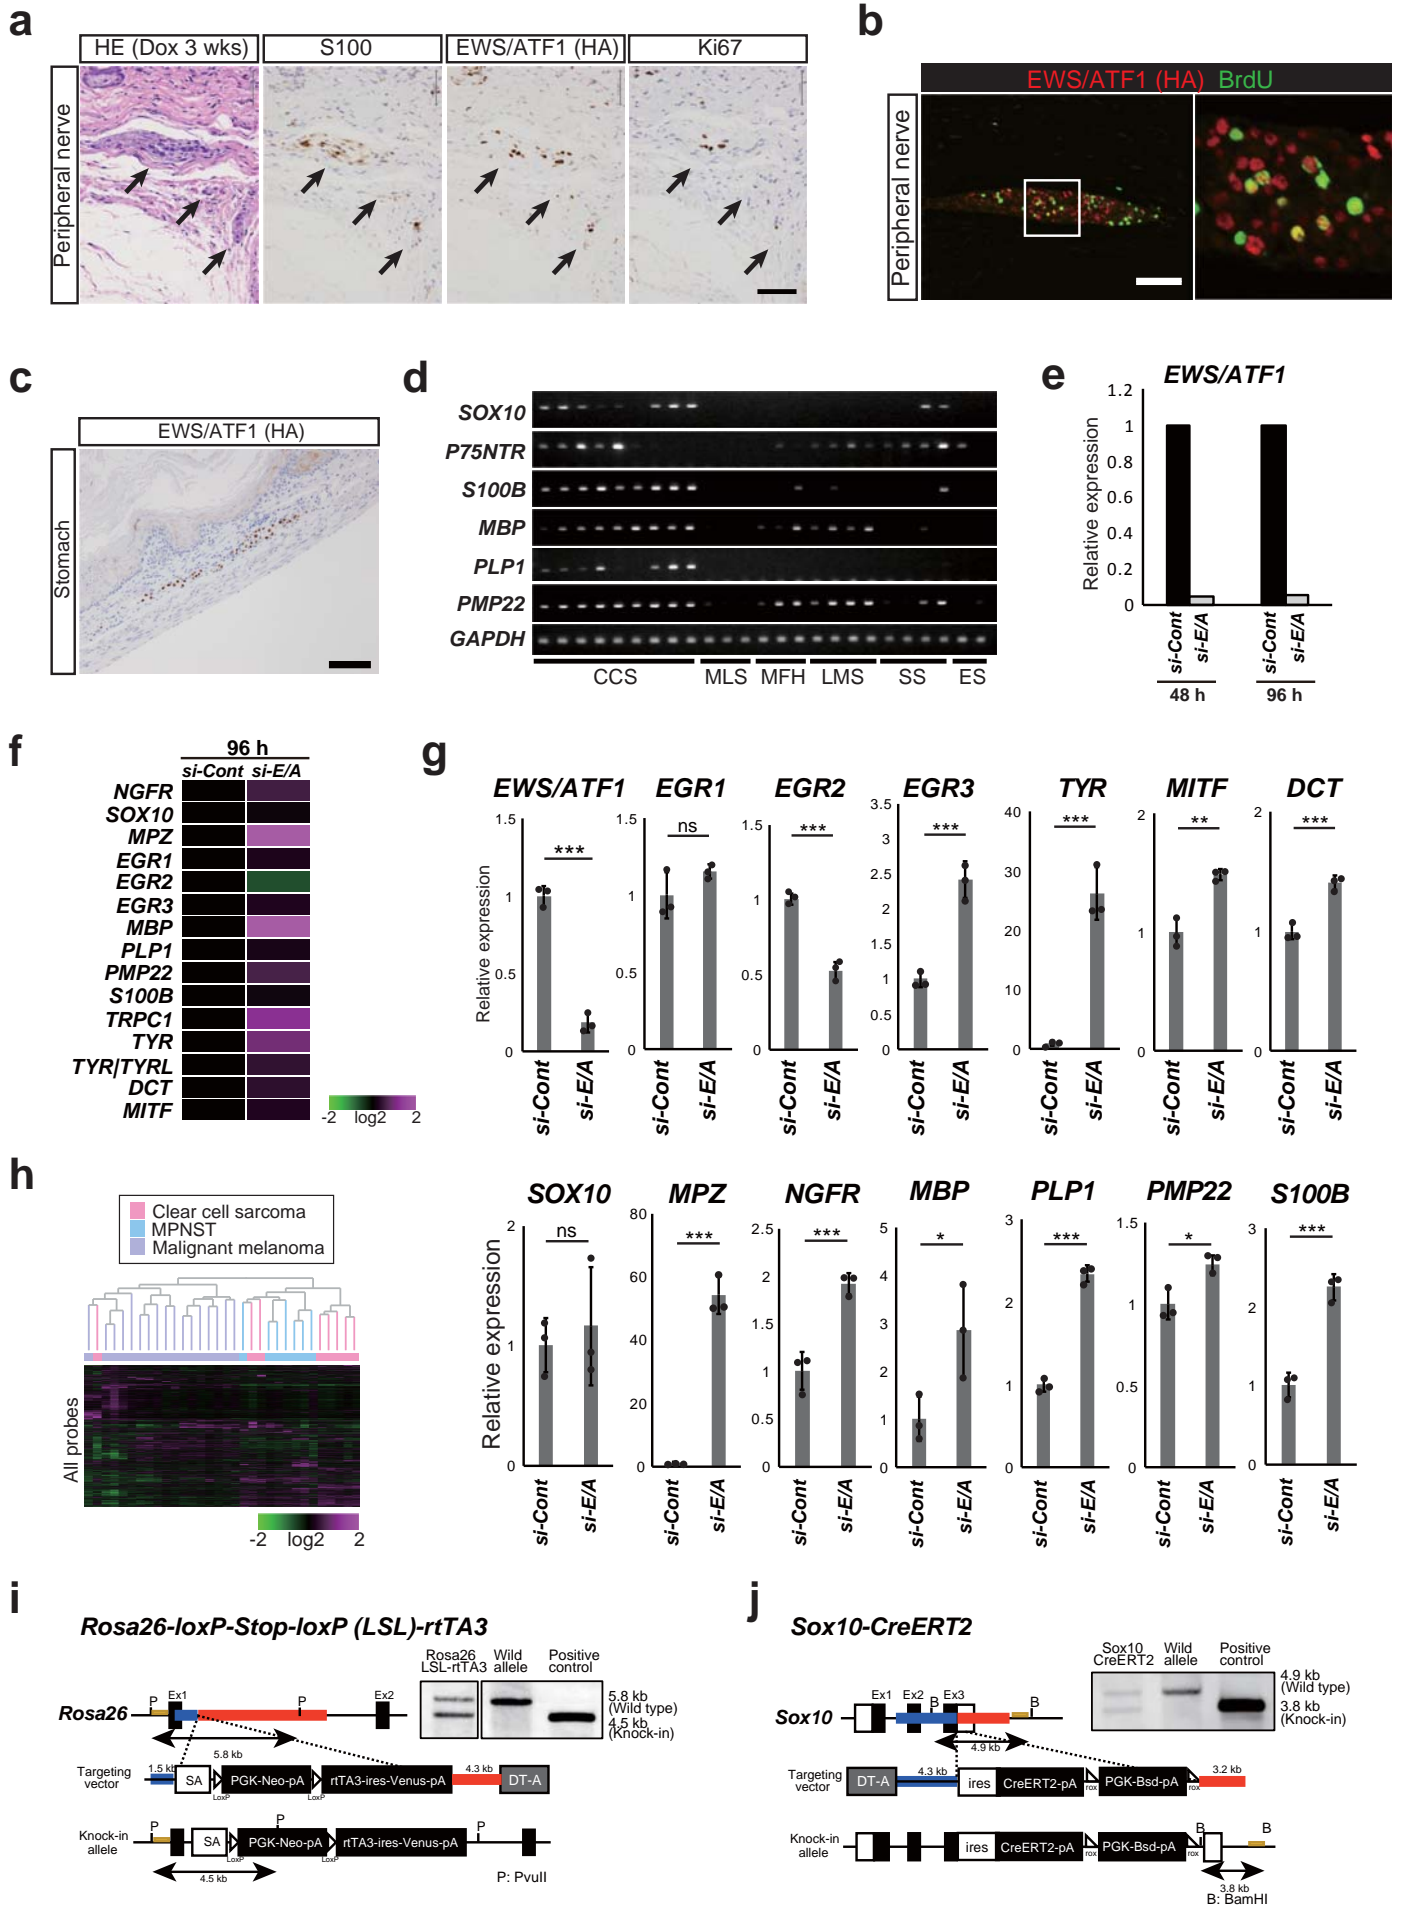

## Supplementary Figure 5.

### Murine and human CCSs harbor Schwann cell properties

- a. Three weeks Dox treatment on a *EWS/ATF1*-inducible mouse resulted in the proliferation of peripheral nerve cells. Arrows indicate peripheral nerves. Scale bar: 50  $\mu\text{m}$ .
- b. *EWS/ATF1*-expressing microscopic tumor cells in ETF-iPSCs chimeric mice after 4 weeks of Dox treatment (left) merged with BrdU signals (right). Scale bar: 100  $\mu\text{m}$ .
- c. HA staining reveals *EWS/ATF1* expression in microscopic sarcoma cells in Auerbach's plexus at gastric wall. Scale bar: 100  $\mu\text{m}$ .
- d. RT-PCR of human surgically-resected sarcoma samples. MLS, malignant liposarcoma; MFH, malignant fibrous histiocytoma; LMS, leiomyosarcoma; SS, synovial sarcoma; ES, Ewing sarcoma. Lanes 8, 9, and 24 are cell lines KAS, MP-CCS-SY, and TC135, respectively. The number of PCR cycles is 35.
- e. Knockdown efficiency for *EWS/ATF1* in MP-CCS-SY samples used in microarray analysis. Data are presented as the mean of technical triplicates. The expression level of *siControl*-treated cells was set to 1.
- f. Microarray analysis of marker genes for neural crest derivatives at 96 hours after knockdown of *EWS/ATF1* in MP-CCS-SY.
- g. A qRT-PCR analysis of marker genes for neural crest derivatives after knockdown of *EWS/ATF1* in MP-CCS-SY. Data are presented as the mean  $\pm$  SD of independent technical triplicates. The mean expression level of *siControl*-treated cells was set to 1. (ns; not significant, \* $P < 0.05$ , \*\* $P < 0.01$ , \*\*\* $P < 0.001$ , two-sided Student's t-test)
- h. Hierarchical clustering analysis and heatmap of global gene expression in human CCSs, MPNSTs, and malignant melanomas by microarray. Color range in heatmap is shown using a log<sub>2</sub> scale.
- i. Schematic representation of the *Rosa26* targeting allele and Southern blot analysis of the obtained clone. Venus fluorescence is hardly detectable in the targeted cells.
- j. Schematic representation of the *Sox10* targeting allele and Southern blot analysis of the obtained clone. ires, internal ribosomal entry site; Bsd, blasticidin resistant gene; PGK, PGK promoter; pA, poly(A) sequence; DT-A, diphtheria toxin A.

a

**Criterion 1**

| Gene symbol  | Sciatic nerve   |           |
|--------------|-----------------|-----------|
|              | Postnatal day 5 | 4 months  |
| <i>Tppp3</i> | 777.4375        | 3340.4214 |
| <i>Gca</i>   | 41.13325        | 185.52594 |
| <i>Gca</i>   | 116.74856       | 438.3229  |
| <i>Plin4</i> | 166.25044       | 3350.2576 |
| <i>Dgat2</i> | 208.93199       | 889.275   |
| <i>Dgat2</i> | 236.84724       | 2019.1979 |

**Criterion 2**

| Gene symbol  | Melanocytes  | Sciatic nerve |
|--------------|--------------|---------------|
|              | <i>Tppp3</i> | 82.07335      |
| <i>Gca</i>   | 17.619337    | 416.95166     |
| <i>Gca</i>   | 10.918382    | 249.06717     |
| <i>Plin4</i> | 58.9481      | 3811.3484     |
| <i>Dgat2</i> | 107.58669    | 855.31305     |
| <i>Dgat2</i> | 135.11526    | 3053.8433     |

**Criterion 3**

| Gene symbol  | G1297     |           |
|--------------|-----------|-----------|
|              | Dox ON    | Dox OFF   |
| <i>Tppp3</i> | 623.8184  | 3406.1687 |
| <i>Gca</i>   | 90.183334 | 571.5056  |
| <i>Plin4</i> | 127.26311 | 881.4622  |
| <i>Dgat2</i> | 207.6215  | 1791.6649 |

b

**Tppp3-EGFP**

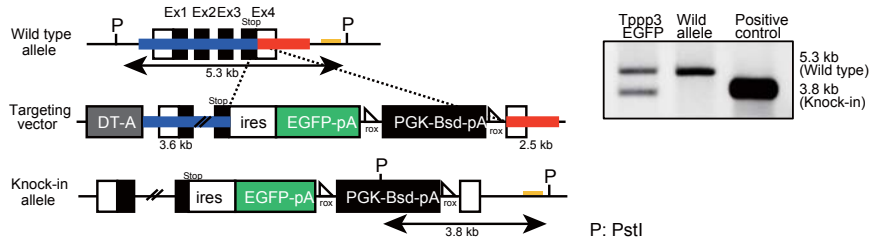

c

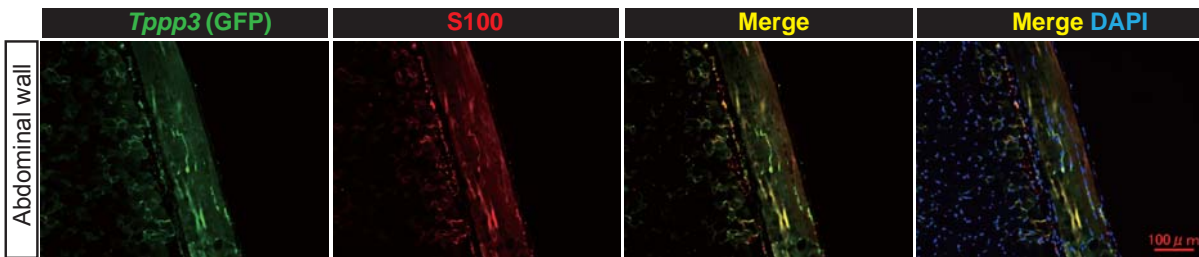

**d Tppp3-CreERT2**

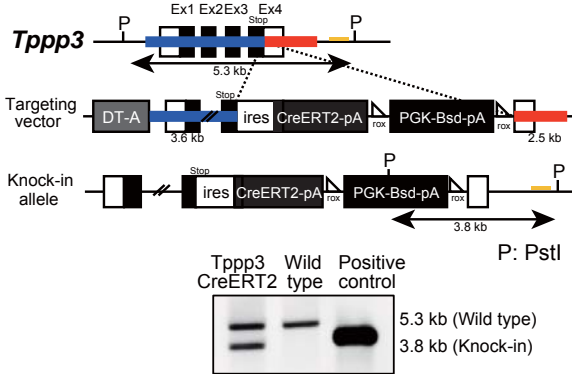

**e Rosa26-loxP-Stop-loxP (LSL)-EWS/ATF1-FLAG-HA**

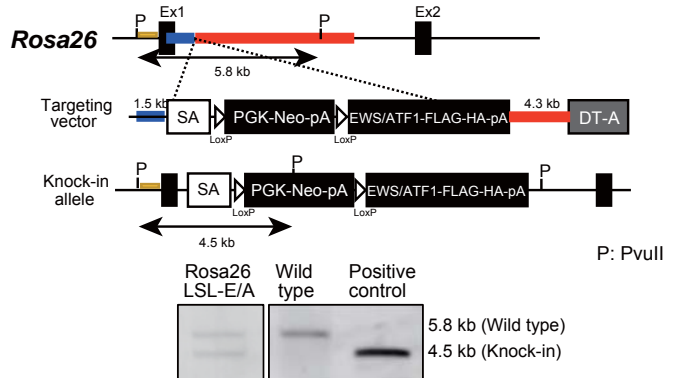

f

**Tppp3-CreERT2 Rosa26-LSL-EWS/ATF1**

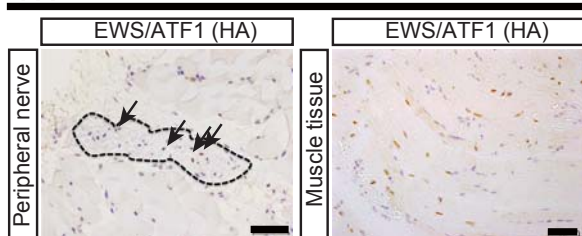

**Sox10-CreERT2 Rosa26-LSL-EWS/ATF1**

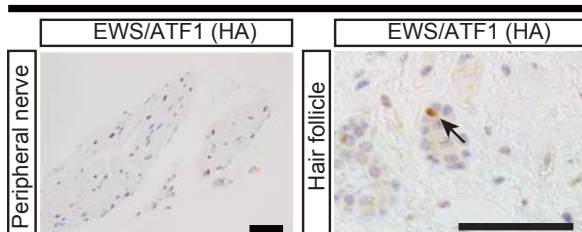

g

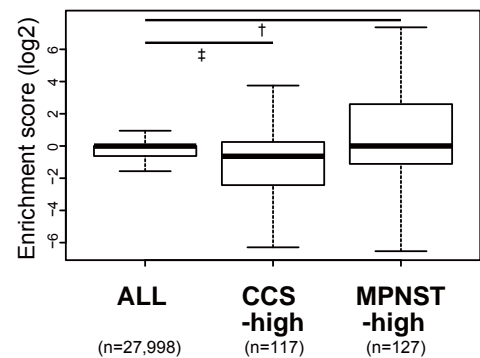

## Supplementary Figure 6.

### Visualization of *Tppp3* expression and conditional *EWS/ATF1* transduction system

- a. The lists of microarray data regarding overlapped 4 genes. Normalized values are indicated.
- b. Schematic representation of the *Tppp3* targeting allele. The *ires-GFP* sequence with a stop cassette is inserted into 3'UTR of the *Tppp3* locus. Southern blot analysis using a 3' external probe shows successful homologous recombination.
- c. Immunofluorescence of the subcutaneous tissue of *Tppp3-EGFP* homo mouse (5 weeks old) using GFP and S100 antibodies. GFP fluorescence (green) is detectable in S100-positive peripheral nerve of soft tissue around the abdominal wall. Scale bar: 100  $\mu$ m.
- d. Schematic representation of the *Tppp3* targeting allele. The *ires-CreERT2* sequence with a stop cassette is inserted into 3'UTR of the *Tppp3* locus. Southern blot analysis of both obtained clones using a 3' external probe shows successful homologous recombination.
- e. Schematic representation of the *Rosa26* targeting allele. The *EWS/ATF1-FLAG-HA* sequence with a stop cassette is inserted into intron 1 of the *Rosa26* locus. SA, splice acceptor; Neo, neomycin resistant gene. Southern blot analysis of the obtained clone using a 5' external probe shows successful homologous recombination.
- f. *Rosa26<sup>stop-E/A</sup>/Tppp3<sup>CreERT2</sup>* mice reveals EWS/ATF1 expression in the peripheral nerves at 1 week after tamoxifen injection (upper panel). *Rosa26<sup>stop-E/A</sup>/Sox10<sup>CreERT2</sup>* mice show EWS/ATF1 expression in both peripheral nerves and hair follicles after tamoxifen injection. EWS/ATF1 expression is detected by HA-immunostaining (lower panel). Arrows indicate the nuclear expressions of EWS/ATF1. Scale bars: 50  $\mu$ m.
- g. Enrichment score <sup>24</sup> of CCS-/MPNST-overexpressed genes in *Sox10/Krox20*-expressing neural crest-derived cells with non-neuronal transcriptional signatures. Upregulated genes in MPNSTs are preferentially expressed in *Sox10/Krox20*-expressing cells (*Sox10* >1.0 or *Krox20* >0.1) while those in CCSs are not. Solid lines in each box indicate the median. The bottom and top of the boxes are lower and upper quartiles, respectively. Whiskers extend to  $\pm 1.5$  interquartile range (IQR). (†, more enriched, P<0.01; ‡, less enriched, P < 0.0001, Mann-Whitney U-test)

# Supplementary Figure 7

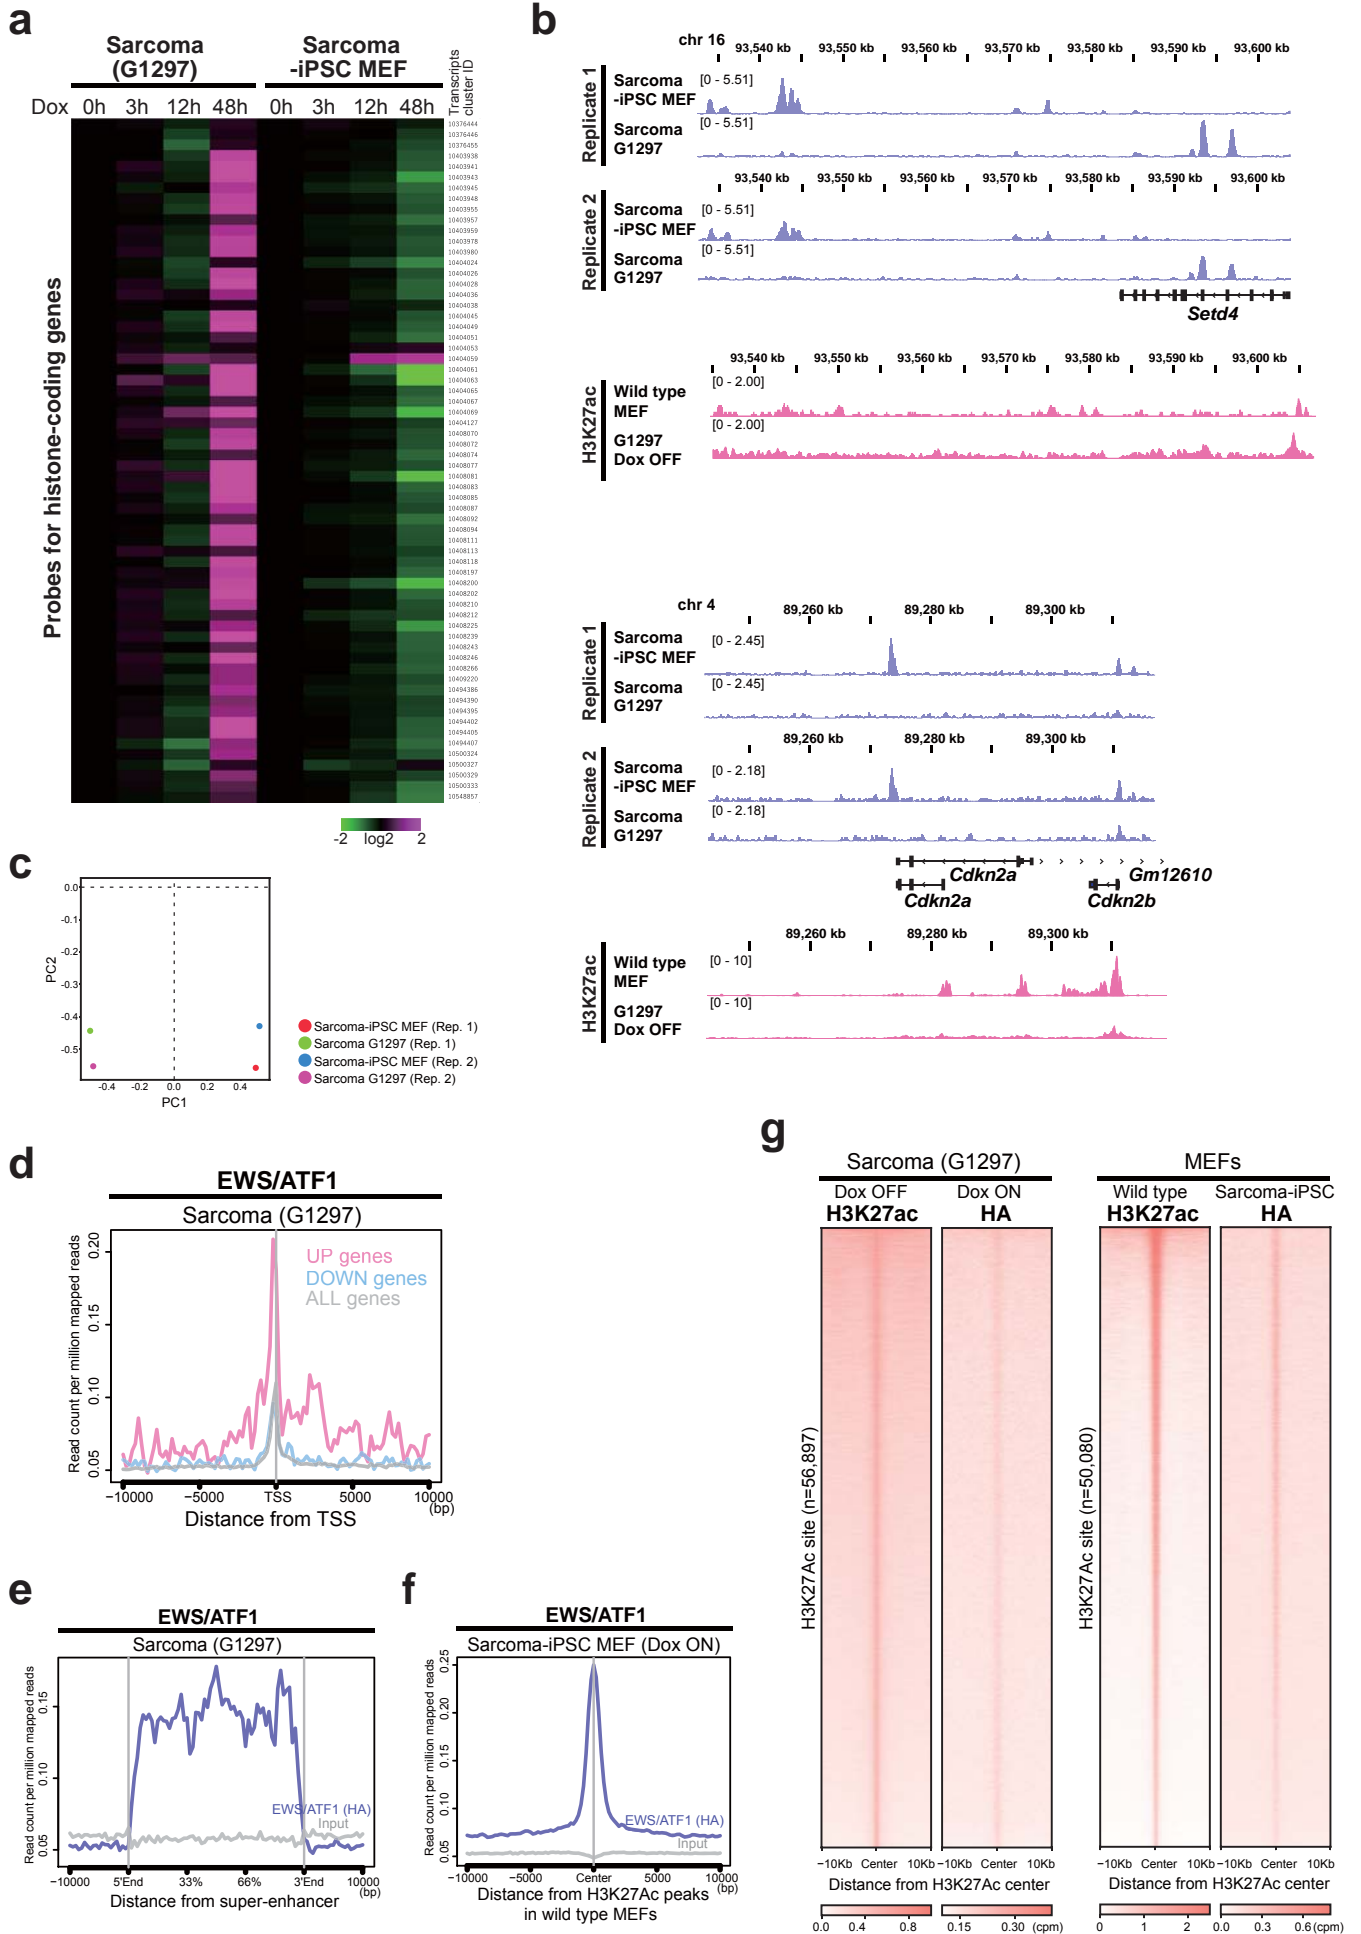

## Supplementary Figure 7.

### Cell type-specific recruitment of EWS/ATF1 plays a role in sarcoma cell growth

- a. Heatmap of histone-coding gene expression in G1297 and sarcoma-iPSC derived MEFs after exposure of Dox. Note that the two cell types respond inversely to EWS/ATF1. Color range is shown using a log<sub>2</sub> scale. Transcripts cluster IDs in Affymetrix Mouse Gene 1.0 ST Array are shown in the right column.
- b. ChIP-seq analysis using HA antibody exhibits the similar EWS/ATF1 binding patterns in two biological replicates. However, H3K27ac pre-marked sites do not correspond to EWS/ATF1 binding sites in these regions, suggesting that H3K27ac pre-marked sites are not always targets of EWS/ATF1 binding, which presumably reflects the different location of binding sites for the enhancer-related transcription factors and ATF1.
- c. PCA analysis with ChIP-seq datasets using HA antibody in G1297 and sarcoma-iPSC MEFs. The global enrichment pattern in each cell type is similar in two independent biological replicates.
- d. ChIP-seq data of G1297 using HA antibody. An enrichment of EWS/ATF1 is observed around the TSSs of upregulated genes after *EWS/ATF1* induction, but not at downregulated genes.
- e. ChIP-seq analysis reveals that EWS/ATF1 is enriched at a super-enhancer of sarcoma cells (G1297), suggesting that EWS/ATF1 plays a role in establishing the super-enhancer in sarcoma cells.
- f. ChIP-seq analysis of sarcoma-iPSC MEFs shows that EWS/ATF1 binding enriches at the H3K27ac pre-marked and open chromatin region in wild type MEFs.
- g. Heatmap of ChIP-seq intensities (copy per million, cpm). Normalized intensities for H3K27ac and HA (HA-tagged EWS/ATF1) within 10 kb +/- from the center of H3K27ac-marked site are shown. Heatmaps were ranked according to H3K27ac enrichment. EWS/ATF1 is enriched at most H3K27Ac pre-marked regions in both sarcoma cells and MEFs.



# Supplementary Figure 8

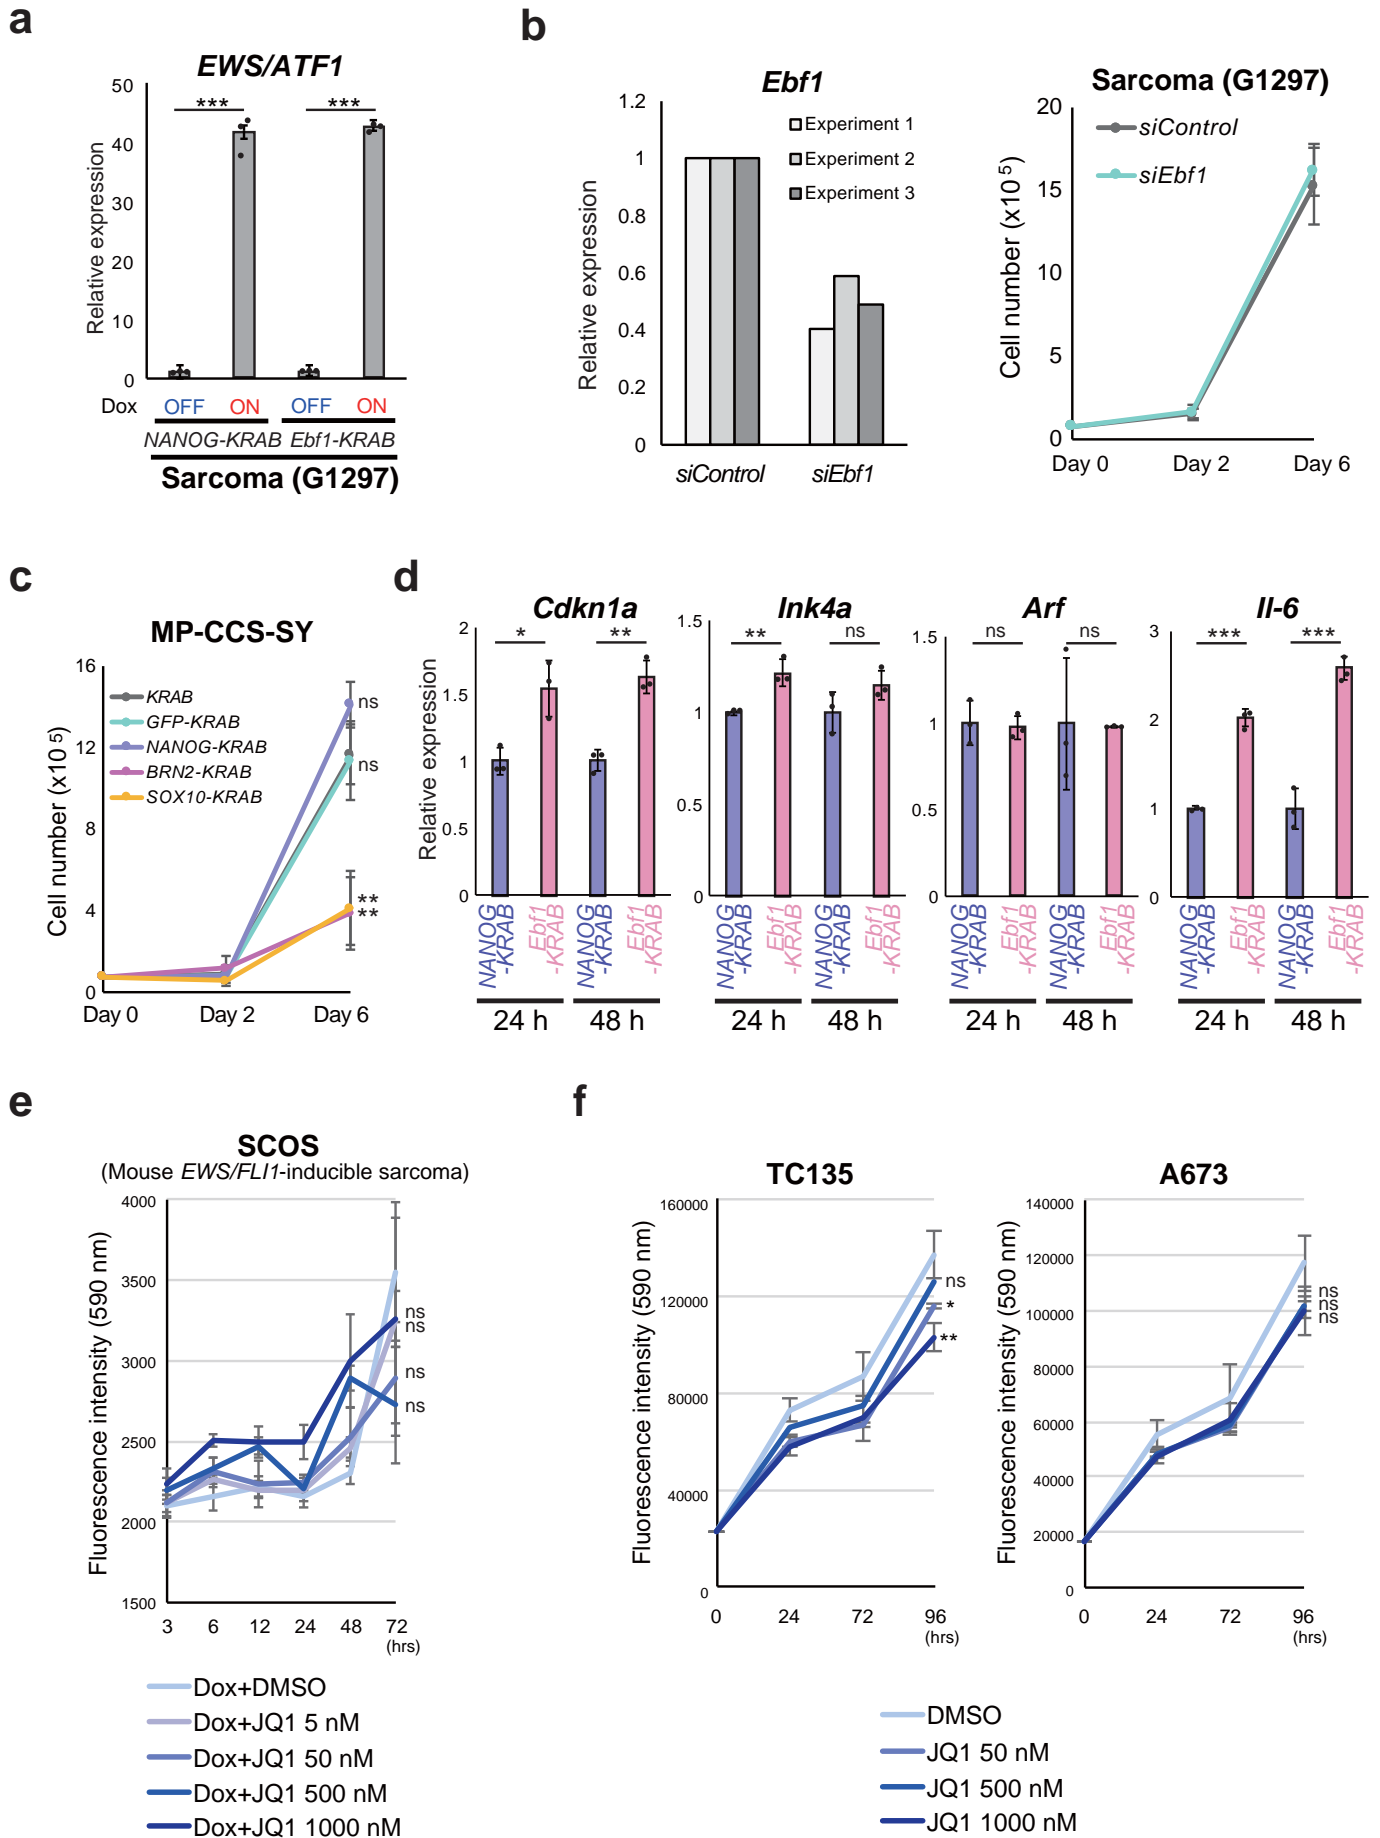

## Supplementary Figure 8.

### Effect of JQ1 treatment on Ewing sarcoma cell growth

- a. Comparison of *EWS/ATF1* expression levels between *Ebfl-KRAB*- and *NANOG-KRAB*-expressing G1297 (\*\*\*P < 0.0001, two-sided Student's t-test). qRT-PCR reveals that *Ebfl-KRAB* transduction does not reduce *EWS/ATF1* expression in G1297. The induction time of *KRAB* fusion genes is 48 hours. Data are presented as mean  $\pm$  SD of independent biological triplicates. The expression level of *NANOG-KRAB*-expressing G1297 (Dox0) was set to 1.
- b. Knockdown of *Ebfl* does not affect cell growth in G1297. Relative knockdown efficiency is shown in the left panel. Data are presented as mean  $\pm$  SD of independent biological triplicates.
- c. Cell growth assay of *KRAB*-fusion-expressing MP-CCS-SY. *SOX10-KRAB* and *BRN2-KRAB* transduction result in the inhibition of CCS cell growth (ns; not significant, \*\*P < 0.01, two-sided Student's t-test). *KRAB*, *GFP-KRAB*, and *NANOG-KRAB* were used as controls. Data are presented as mean  $\pm$  SD of independent biological triplicates.
- d. A qRT-PCR analysis for *Cdkn1a*, *Ink4a*, *Arf*, and *Il-6* in sarcoma cells (G1297) expressing *NANOG-KRAB* and *Ebfl-KRAB* at 24 h and 48 h. *Ebfl-KRAB*-expressing G1297 exhibits an increased expression of *Cdkn1a* and *Ink4a*, as well as *IL-6* (ns; not significant, \*P < 0.05, \*\*P < 0.01, \*\*\*P < 0.001, two-sided Student's t-test). Data are presented as the mean  $\pm$  SD of independent biological triplicates. The mean expression level of *NANOG-KRAB*-expressing G1297 was set to 1.
- e. Effect of JQ1 treatment on growth of mouse EWS/FLI1-induced sarcoma cells (ns; not significant, two-sided Student's t-test). Data are presented as mean  $\pm$  SD of independent biological triplicates.
- f. Effect of JQ1 treatment on growth of human Ewing sarcoma cells (ns; not significant, \*P < 0.05, \*\*P < 0.01, two-sided Student's t-test). Data are presented as mean  $\pm$  SD of independent biological triplicates.

# Supplementary Figure 9

Figure 4d

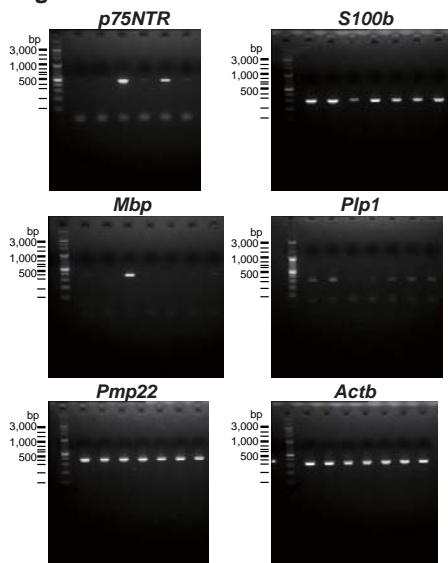

Supplementary Figure 1f Supplementary Figure 2e Supplementary Figure 2f

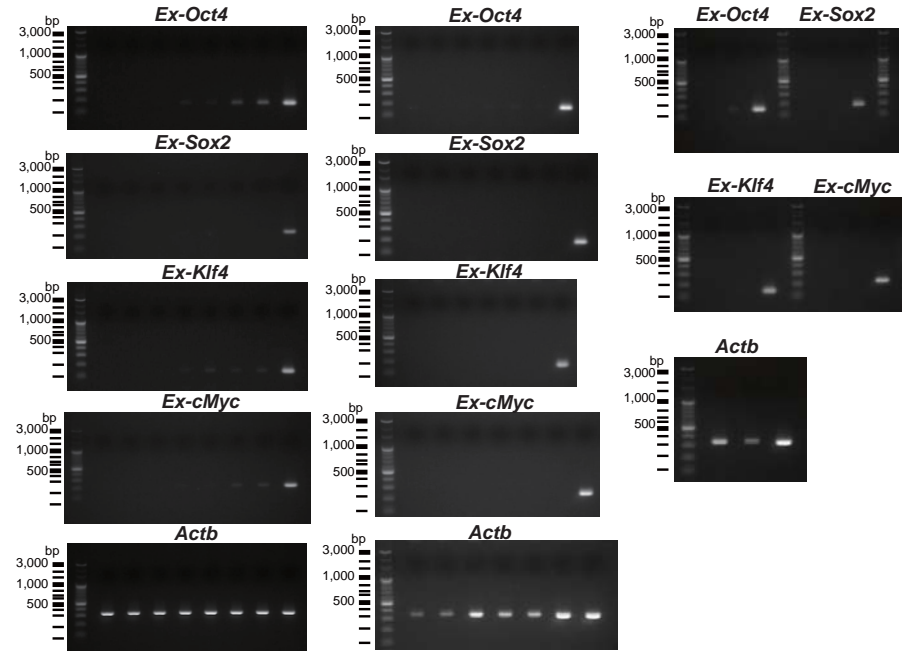

Supplementary Figure 5i

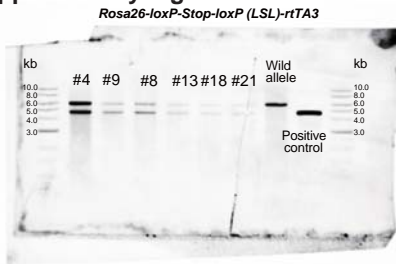

Supplementary Figure 5d

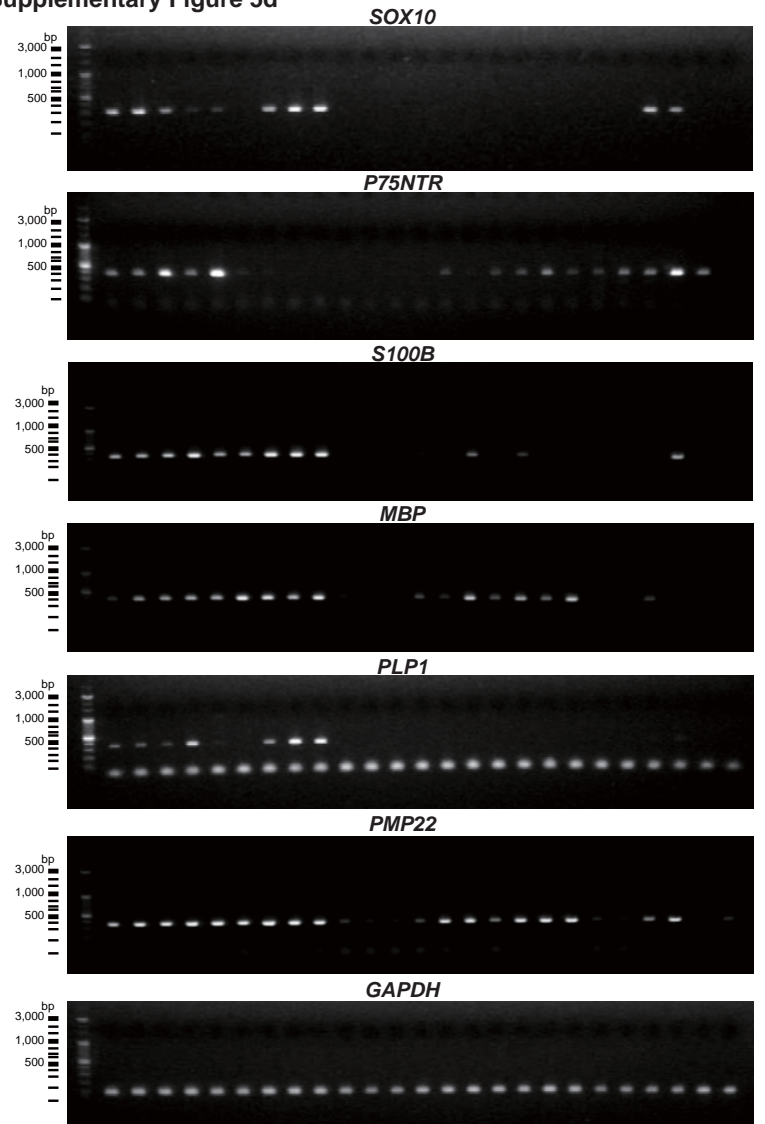

Supplementary Figure 6d Supplementary Figure 6b

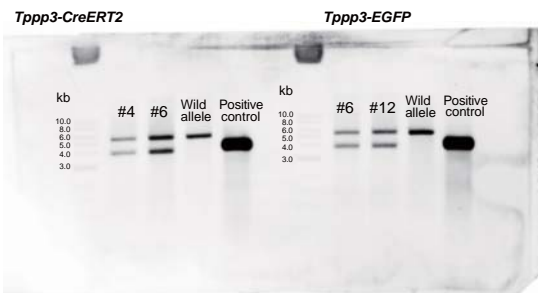

Supplementary Figure 5j Supplementary Figure 6e

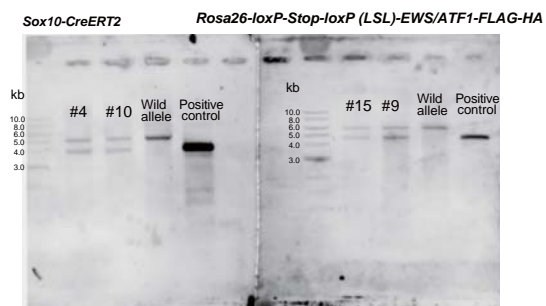

**Supplementary Figure 9.**

This file contains uncropped gel image data.

Supplementary Table 1: A list of potential mutation sites in sarcoma (G1297) and sarcoma-iPSC #3.

| Chromosome | position    | Gene          | Base changes    |      | Amino acid changes |      | Sarcoma (G1297) |                  | Sarcoma-iPSC #3 |                  |
|------------|-------------|---------------|-----------------|------|--------------------|------|-----------------|------------------|-----------------|------------------|
|            |             |               | Ref.            | Alt. | Ref.               | Alt. | Mutation freq.  | Sequencing depth | Mutation freq.  | Sequencing depth |
| chr1       | 135,457,866 | Nav1          | TA              | T    |                    |      | 0.571428571     | 21               | 0.333333333     | 24               |
| chr2       | 66,536,265  | Son9a         | CAATTCCAGATTAAA | C    |                    |      | 0.275862069     | 29               | 0.452380952     | 42               |
| chr2       | 82,990,281  | Fsfp2         | C               | CT   |                    |      | 0.462962963     | 54               | 0.617021277     | 47               |
| chr14      | 30,142,701  | Cacna1d       | T               | A    |                    |      | 0.489795918     | 49               | 0.586206897     | 58               |
| chr15      | 91,731,509  | Lrrk2         | A               | T    |                    |      | 0.355555556     | 45               | 0.431372549     | 51               |
| chr1       | 9,687,657   | Mybl1         | T               | G    | Lys                | Thr  | 0.430232558     | 86               | 0.554347826     | 92               |
| chr1       | 74,576,049  | Zfp142        | G               | C    | Ala                | Gly  | 0.46728972      | 107              | 0.467153285     | 137              |
| chr1       | 75,175,009  | Abcb6         | T               | G    | Glu                | Asp  | 0.417391304     | 230              | 0.474358974     | 312              |
| chr1       | 92,641,894  | Myeov2        | C               | T    | Val                | Met  | 0.392156863     | 51               | 0.493975904     | 83               |
| chr1       | 154,493,310 | Caona1e       | T               | C    | Asp                | Gly  | 0.43442623      | 122              | 0.536585366     | 123              |
| chr1       | 166,485,696 | Qm4846        | T               | G    | Lys                | Thr  | 0.416866667     | 96               | 0.482758621     | 116              |
| chr1       | 171,229,915 | Fcer1g        | G               | A    | Arg                | Trp  | 0.507042254     | 71               | 0.452380952     | 84               |
| chr1       | 181,117,449 | Nvl           | G               | A    | Thr                | Ile  | 0.453333333     | 75               | 0.48            | 100              |
| chr1       | 184,727,729 | Hlx           | T               | C    | Lys                | Thr  | 0.551724138     | 29               | 0.512195122     | 41               |
| chr2       | 26,950,603  | Stklid1       | A               | G    | Gln                | His  | 0.555555556     | 45               | 0.450980392     | 51               |
| chr2       | 28,505,328  | Gbgt1         | G               | A    | Arg                | Gln  | 0.5             | 16               | 0.473684211     | 38               |
| chr2       | 60,376,098  | Ly75          | A               | C    | Phe                | Val  | 0.466666667     | 75               | 0.494736842     | 95               |
| chr2       | 90,003,275  | Olfir1262     | A               | G    | Lys                | Glu  | 0.365853659     | 82               | 0.425           | 80               |
| chr2       | 90,003,308  | Olfir1262     | C               | A    | His                | Asn  | 0.457627119     | 59               | 0.397058824     | 68               |
| chr2       | 103,731,413 | Nat10         | C               | G    | Gly                | Ala  | 0.469387755     | 49               | 0.514285714     | 70               |
| chr2       | 122,118,208 | Spg11         | A               | G    | Leu                | Pro  | 0.466666667     | 15               | 0.421052632     | 19               |
| chr2       | 129,075,947 | Tdl           | G               | A    | Ala                | Thr  | 0.465116279     | 43               | 0.571428571     | 84               |
| chr2       | 160,908,453 | Emilin3       | A               | C    | Phe                | Val  | 0.313953488     | 86               | 0.464285714     | 112              |
| chr2       | 163,825,267 | Wisp2         | T               | C    | Ser                | Pro  | 0.488372093     | 43               | 0.55            | 60               |
| chr2       | 174,298,266 | Gnas          | A               | G    | Lys                | Arg  | 0.465116279     | 43               | 0.465753425     | 73               |
| chr2       | 179,935,121 | Taf4a         | T               | C    | Ser                | Gly  | 0.3             | 20               | 0.466666667     | 30               |
| chr3       | 20,228,836  | Cpa3          | A               | C    | Val                | Gly  | 0.483870968     | 62               | 0.46835443      | 79               |
| chr3       | 30,631,424  | Lrrc34        | G               | A    | Arg                | Cys  | 1               | 35               | 1               | 43               |
| chr4       | 21,782,906  | Usp45         | C               | G    | Ser                | Arg  | 0.457142857     | 35               | 0.588235294     | 34               |
| chr4       | 43,415,909  | Rusc2         | T               | C    | Leu                | Pro  | 0.5375          | 80               | 0.526315789     | 133              |
| chr4       | 99,065,385  | Dock7         | G               | C    | Ala                | Gly  | 0.515151515     | 33               | 0.487179487     | 39               |
| chr4       | 114,194,610 | Skint11       | A               | C    | Ser                | Arg  | 0.481012658     | 79               | 0.461538462     | 65               |
| chr4       | 134,202,410 | Gm7534        | A               | C    | Leu                | Val  | 0.50390625      | 256              | 0.462650602     | 415              |
| chr4       | 152,113,859 | Plekhh5       | T               | C    | Ser                | Pro  | 0.412698413     | 63               | 0.540540541     | 111              |
| chr4       | 152,377,037 | Chd5          | G               | C    | Asp                | His  | 0.380952381     | 21               | 0.68            | 25               |
| chr5       | 24,387,499  | Atg9b         | A               | A    | Leu                | Arg  | 0.534883721     | 43               | 0.538461538     | 52               |
| chr5       | 86,197,743  | Gnrhr         | A               | C    | Leu                | His  | 0.459459459     | 37               | 0.528301887     | 53               |
| chr5       | 106,874,850 | Hfm1          | A               | T    | Leu                | His  | 0.512195122     | 41               | 0.480769231     | 52               |
| chr5       | 110,189,798 | Golga3        | A               | C    | Asn                | His  | 0.482758621     | 29               | 0.468085106     | 47               |
| chr5       | 124,401,167 | Sbno1         | G               | C    | Ala                | Gly  | 0.426829268     | 82               | 0.567010309     | 97               |
| chr5       | 125,023,557 | Ncor2         | T               | C    | Lys                | Arg  | 0.47826087      | 138              | 0.454022989     | 174              |
| chr5       | 138,757,965 | Fam20c        | A               | C    | Lys                | Thr  | 0.458646617     | 133              | 0.431924883     | 213              |
| chr6       | 11,987,092  | Phf14         | A               | C    | Lys                | Thr  | 0.296875        | 64               | 0.362318841     | 69               |
| chr6       | 66,637,410  | Vmn1r34       | A               | C    | Phe                | Val  | 0.340369393     | 379              | 0.362186788     | 439              |
| chr6       | 132,312,261 | Prpmp5        | C               | A    | Gly                | Val  | 0.277161863     | 451              | 0.308712121     | 528              |
| chr7       | 10,714,353  | Nlrp4b        | A               | T    | Asn                | Ile  | 0.50617284      | 81               | 0.422680412     | 97               |
| chr7       | 25,638,165  | Bckdha        | C               | G    | Ala                | Pro  | 0.49122807      | 57               | 0.416666667     | 96               |
| chr7       | 34,934,711  | Pepd          | A               | C    | Lys                | Thr  | 0.461538462     | 39               | 0.407407407     | 81               |
| chr7       | 46,701,922  | Saal1         | A               | T    | Leu                | His  | 0.426829268     | 82               | 0.441489362     | 188              |
| chr7       | 83,897,950  | Mesdc2        | A               | C    | Lys                | Thr  | 0.354166667     | 48               | 0.631578947     | 57               |
| chr7       | 86,465,510  | Olfir299      | A               | C    | Tyr                | Ser  | 0.397163121     | 141              | 0.482517483     | 143              |
| chr7       | 102,973,357 | Olfir577      | C               | T    | Val                | Met  | 0.525423729     | 59               | 0.555555556     | 63               |
| chr8       | 107,058,173 | Nip7          | G               | T    | Ala                | Ser  | 0.472222222     | 36               | 0.463414634     | 41               |
| chr8       | 107,413,008 | Nob1          | G               | C    | Ser                | Trp  | 0.454545455     | 22               | 0.428571429     | 42               |
| chr8       | 110,600,251 | Hydin         | T               | G    | Phe                | Val  | 0.461538462     | 65               | 0.476923077     | 130              |
| chr8       | 116,933,299 | Cenpn         | T               | C    | Phe                | Val  | 0.46875         | 32               | 0.440677966     | 58               |
| chr9       | 44,256,464  | Nlrx1         | T               | C    | Lys                | Arg  | 0.613636364     | 44               | 0.592592593     | 81               |
| chr9       | 58,026,196  | Cyp11a1       | T               | G    | Phe                | Val  | 0.464285714     | 56               | 0.391304348     | 92               |
| chr9       | 58,870,963  | Myo9a         | T               | C    | Leu                | Pro  | 0.382352941     | 34               | 0.538461538     | 52               |
| chr10      | 12,720,929  | Utrn          | T               | G    | Ser                | Arg  | 0.661654135     | 133              | 0.595505618     | 178              |
| chr10      | 22,286,289  | H60b          | A               | T    | Ser                | Cys  | 0.573529412     | 68               | 0.636363636     | 77               |
| chr10      | 67,244,839  | Jmjd1c        | A               | C    | Ser                | Pro  | 0.483870968     | 31               | 0.326530612     | 49               |
| chr10      | 75,949,293  | Vpreb3        | T               | C    | Leu                | Pro  | 0.568965517     | 58               | 0.669724771     | 109              |
| chr10      | 79,781,166  | Fst3          | T               | G    | Leu                | Arg  | 0.601123596     | 178              | 0.666666667     | 294              |
| chr10      | 81,332,714  | Tbxa2r        | T               | G    | Val                | Gly  | 0.714285714     | 56               | 0.691489362     | 94               |
| chr10      | 129,892,035 | Olfir803      | T               | C    | Lys                | Arg  | 0.658227848     | 79               | 0.783333333     | 60               |
| chr11      | 3,819,900   | Osbp2         | G               | C    | His                | Asp  | 0.625           | 56               | 0.489583333     | 96               |
| chr11      | 84,342,011  | Acaca         | A               | G    | Glu                | Lys  | 0.558139535     | 86               | 0.597826087     | 92               |
| chr11      | 87,549,488  | Tex14         | A               | C    | Asn                | Thr  | 0.425           | 80               | 0.441860465     | 129              |
| chr11      | 106,019,137 | Kcnh6         | T               | C    | Val                | Ala  | 0.397435897     | 156              | 0.553278689     | 244              |
| chr11      | 110,244,291 | Abca6         | A               | G    | Phe                | Leu  | 0.444444444     | 36               | 0.47826087      | 69               |
| chr11      | 115,616,648 | Slc25a19      | T               | G    | Asn                | Thr  | 0.513513514     | 37               | 0.430379747     | 79               |
| chr12      | 114,682,664 | Ighv1-18      | A               | T    | Ser                | Thr  | 0.50245098      | 408              | 0.505102041     | 392              |
| chr13      | 22,244,744  | Vmn1r194      | T               | G    | Val                | Gly  | 0.388235294     | 85               | 0.449438202     | 89               |
| chr13      | 74,150,794  | Slc9a3        | T               | G    | Phe                | Val  | 0.462121212     | 132              | 0.445121951     | 164              |
| chr13      | 100,489,143 | Gtf2h2        | A               | T    | Ala                | His  | 0.490196078     | 51               | 0.512820513     | 78               |
| chr13      | 113,095,902 | Gzma          | T               | G    | Lys                | Thr  | 0.52173913      | 69               | 0.53125         | 96               |
| chr14      | 20,651,261  | Myoz1         | A               | G    | Phe                | Leu  | 0.428571429     | 14               | 0.5             | 32               |
| chr15      | 98,457,041  | Olfir281      | C               | C    | His                | Tyr  | 0.52238806      | 67               | 0.441176471     | 102              |
| chr15      | 101,892,462 | Krt76         | C               | A    | Cys                | Phe  | 0.390243902     | 41               | 0.425           | 40               |
| chr16      | 18,437,532  | Txnrd2        | T               | G    | Val                | Gly  | 0.48            | 25               | 0.421052632     | 19               |
| chr16      | 36,969,911  | Fbxo40        | A               | C    | Leu                | Arg  | 0.622807018     | 114              | 0.555555556     | 108              |
| chr16      | 88,627,399  | 2310079G19Rik | C               | G    | Cys                | Ser  | 0.476923077     | 65               | 0.365079365     | 63               |
| chr17      | 24,702,480  | Tbl3          | A               | T    | Asp                | Val  | 0.492537313     | 67               | 0.476190476     | 126              |
| chr17      | 25,111,118  | Telo2         | T               | A    | Lys                | Met  | 0.523364486     | 107              | 0.549618321     | 131              |
| chr17      | 34,696,037  | Tnxb          | T               | C    | Ser                | Pro  | 0.478378378     | 370              | 0.435763889     | 576              |
| chr17      | 40,880,380  | 9130008F23Rik | A               | C    | Leu                | Val  | 0.435714286     | 140              | 0.475903614     | 166              |
| chr17      | 72,205,866  | Alk           | A               | C    | Val                | Gly  | 0.40070922      | 282              | 0.493112948     | 363              |
| chr18      | 6,225,597   | Kif5b         | T               | G    | Asn                | His  | 0.432432432     | 185              | 0.464435146     | 239              |
| chr18      | 36,796,519  | Zmat2         | T               | G    | Ser                | Ala  | 0.390243902     | 41               | 0.596153846     | 52               |
| chr18      | 64,265,605  | St8sia3       | C               | G    | Ala                | Gly  | 0.460526316     | 76               | 0.474226804     | 97               |
| chr19      | 13,145,793  | Olfir1459     | T               | C    | Ser                | Gly  | 0.470588235     | 221              | 0.488479263     | 217              |
| chrX       | 56,960,158  | Adgrg4        | A               | G    | Asn                | Ser  | 1               | 20               | 1               | 33               |
| chrX       | 66,654,905  | Slitrk2       | A               | T    | Lys                | Met  | 0.980392157     | 51               | 1               | 70               |

Supplementary Table 2: Primers used in this study.

|         | Genes                      | Forward (5' → 3')             | Reverse (5' → 3')              | Reference                   |                                 |
|---------|----------------------------|-------------------------------|--------------------------------|-----------------------------|---------------------------------|
| qRT-PCR | <b>Mouse</b>               |                               |                                |                             |                                 |
|         | <i>EWS/ATF1</i>            | CAATATAGCCAACAGAGCAGCAG       | CTCCAAGGGGAGGACTTTTG           |                             |                                 |
|         | <i>Nanog</i>               | TGCTTACAAGGGTCTGCTACTG        | TAGAAGAATCAGGGTGCCTTG          |                             |                                 |
|         | <i>Oct3/4 (endogenous)</i> | TCCCATGCATTCAAAGTCTGAG        | CCACCCCTGTTGTGCTTTTA           |                             |                                 |
|         | <i>Ink4a</i>               | CCGCTGCAGACAGACTGG            | TCGAATCTGCACCGTAGTTG           |                             |                                 |
|         | <i>Arf</i>                 | GTGCGAGGTTCTTGGTCACT          | TCGAATCTGCACCGTAGTTG           |                             |                                 |
|         | <i>Cdkn1a</i>              | TTGCACTCTGGTGTCTGAGC          | TCTGCGCTTGGAGTGATAGA           |                             |                                 |
|         | <i>IL-6</i>                | GTTCTCTGGGAAATCGTGGA          | GGTACTCCAGAAGACCAGAGGA         | (Mosterio et al. 2016)      |                                 |
|         | <i>Ebf1</i>                | CAGCAGTGAACAGAGAGTGC          | ACATGGGAGGGACAATCATGC          |                             |                                 |
|         | <i>Actb</i>                | GCCAACCGTGAAAAGATGAC          | TCCGGAGTCCATCACAATG            |                             |                                 |
|         | <b>Human</b>               |                               |                                |                             |                                 |
|         | <i>EWS/ATF1</i>            | GAAGAGGGGATTTGATCGT           | TTTTCTGCCCGGTATCTT             |                             |                                 |
|         | <i>Sox10</i>               | GGCTCCCCATGTCAGAT             | GCTGATCTACCAATGTCCA            |                             |                                 |
|         | <i>MPZ</i>                 | GAATTTGCACAAGCCAGGAA          | CCTTGGCCTTCTTCTCACTG           |                             |                                 |
|         | <i>NGFR</i>                | CCCTGTCTATTGCTCCATCC          | CTGTTGGCTCCTTGCTTGT            |                             |                                 |
|         | <i>TYR</i>                 | TTATCCAAAGATCTGGGCTA          | CAGATCCGACTCGCTTGTTT           |                             |                                 |
|         | <i>MITF</i>                | GAATCTTGGGCTTGATGGA           | GGACAGGAGTTGCTGATGGT           |                             |                                 |
|         | <i>DCT</i>                 | ACAAACGCTTTGCCACATTC          | AGGCATCTGCAGGAGGATTA           |                             |                                 |
|         | <i>S100B</i>               | AGGGAGACAAGCACAAGCTG          | TCCACAACCTCCTGCTCTTT           |                             |                                 |
|         | <i>EGR1</i>                | AGCCCTACGAGCACCTGAC           | AGCGGCCAGTATAGGTGATG           |                             |                                 |
|         | <i>EGR2</i>                | GGTGACCATCTTCCCAATG           | AGGGTCAATGGAGAAGCTTG           |                             |                                 |
|         | <i>EGR3</i>                | CAGCGACTCGGTAGTCCATT          | GGAAGGAGCCGGAGTAAGAG           |                             |                                 |
|         | <i>TPPP3</i>               | ATGGCAAGAAGTGGCCAAG           | TTGATGACCCGAGCAGACTTC          |                             |                                 |
|         | <i>PLP1</i>                | CCAAATGACCTTCCACCTGT          | CATGAGTTTAAGGACGGCAAA          |                             |                                 |
|         | <i>PMP22</i>               | CCTCAGGAAATGCCACCAC           | AGGGTGAAGAGTTGGCAGAA           |                             |                                 |
|         | <i>MBP</i>                 | ACGCAGGCAACGAGAATTA           | CGTGAAGTTCAACCCAGGTT           |                             |                                 |
|         | <i>GAPDH</i>               | ATGGGGAAGGTGAAGGTCG           | GGGGTCAATGATGGCAACAATA         |                             |                                 |
| RT-PCR  | <b>Mouse</b>               |                               |                                |                             |                                 |
|         | <i>p75NTR</i>              | CCTGCCAGGACAAACAGAAC          | GCAGTTTCTCTCCTCTGGT            |                             |                                 |
|         | <i>Mbp</i>                 | GGCTGGAAGAAGAGAAGCG           | TGGCATGGTCCATGGTACTT           |                             |                                 |
|         | <i>Plp1</i>                | TGTTGATGGCTCCTGGTGT           | CCATGAGTTTAAGGACGGCG           |                             |                                 |
|         | <i>S100b</i>               | CCCAGTTCTCTCTGCAGGAA          | CTGGAAGTCACTCCCAT              |                             |                                 |
|         | <i>Pmp22</i>               | TTGCTCTTCGTCTCCACCAT          | ATGATACCACTGAGGAGGGC           |                             |                                 |
|         | <i>Actb</i>                | GCTACAGCTTACCACCACA           | CTTCTGCATCCTGTGAGCAA           |                             |                                 |
|         | <b>Human</b>               |                               |                                |                             |                                 |
|         | <i>SOX10</i>               | CTACAAGAGCGCCACTTGG           | GTAGCTGCTCACATGGCCTG           |                             |                                 |
|         | <i>P75NTR</i>              | CGGACAACCTCATCCCTGTC          | CTATGTGCTCGGGCTGGTAG           |                             |                                 |
|         | <i>S100B</i>               | ATGTCTGAGCTGGAGAAGGC          | AGCTCCTACTAGGCTCAAG            |                             |                                 |
|         | <i>MBP</i>                 | CACGGACAACCTCAGAGGAC          | CTCTGTGCCTTGGGAGGAAG           |                             |                                 |
|         | <i>PLP1</i>                | GTGGCCACTGGATTGTGTTT          | AAACAATGACACACCCGCTC           |                             |                                 |
|         | <i>PMP22</i>               | GCTCCTCCTGTTGCTGAGTA          | ATCCGAGTTGAGATGCCACT           |                             |                                 |
|         | <i>Ex-hOCT3/4</i>          | GCTCTCCCATGCATTCAAAGTGA       | CTTACGCGAAATACGGGCAGACA        |                             |                                 |
|         | <i>Ex-hSOX2</i>            | TTCACATGTCCAGCACTACCAGA       | GACATGGCCTGCCCGTTATTATT        |                             |                                 |
|         | <i>Ex-hKLF4</i>            | CCACTCGCCTTACACATGAAGA        | GACATGGCCTGCCCGTTATTATT        |                             |                                 |
|         | <i>Ex-h-cMYC</i>           | ATACATCTGTCCGTCACAGCAGA       | GACATGGCCTGCCCGTTATTATT        |                             |                                 |
|         | Bisulfite genomic sequence | <i>Nanog</i> promoter         | GATTTTGTAGTTGGGATTAATTGTGAATTT | ACCAAAAAACCCACTCATATCAATATA | (Takahashi and Yamanaka 2006)   |
|         |                            | <i>Oct3/4</i> distal enhancer | GGTTTTAGAGTTGGTTTTGGG          | CATCTCTCAACCTCTCCATAAATC    | (Theunissen, Costa et al. 2011) |
